# Supplementary material for: A highly tough, fatigue-resistant, low hysteresis hybrid hydrogel with a hierarchical cross-linked structure for wearable strain sensors
Source: Royal Society of Chemistry journal article supplement (doi:10.1039/d3ta02584e), 2023-01-01
Supplement: d3ta02584e1.pdf [file d3ta02584e1.pdf]

# Highly Tough, Fatigue-Resistant, Low Hysteresis Hybrid Hydrogel with Hierarchical Cross-Linked Structure for Wearable Strain Sensor

Shiqiang Guan,<sup>‡</sup> Chang Xu,<sup>‡</sup> Xufeng Dong\*, and Min Qi

School of Materials Science and Engineering, Dalian University of Technology, Dalian, 116024, P.

R. China.

\* Corresponding to: Professor Xufeng Dong (dongxf@dlut.edu.cn)

<sup>‡</sup>These two authors have equal contributions.

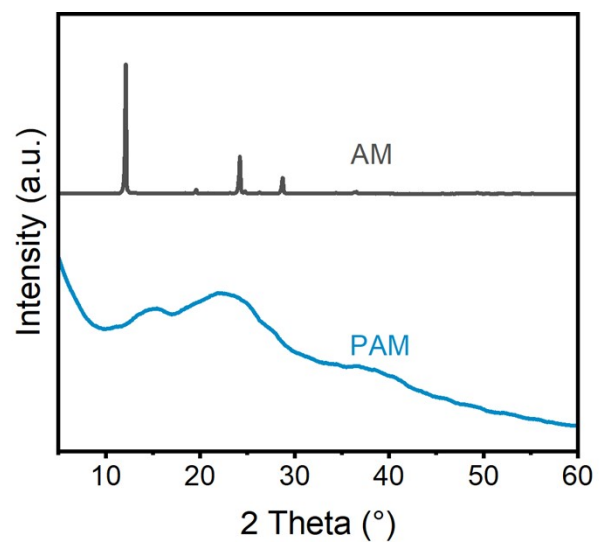

**Fig. S1.** XRD patterns of pure AM monomer and PAM.

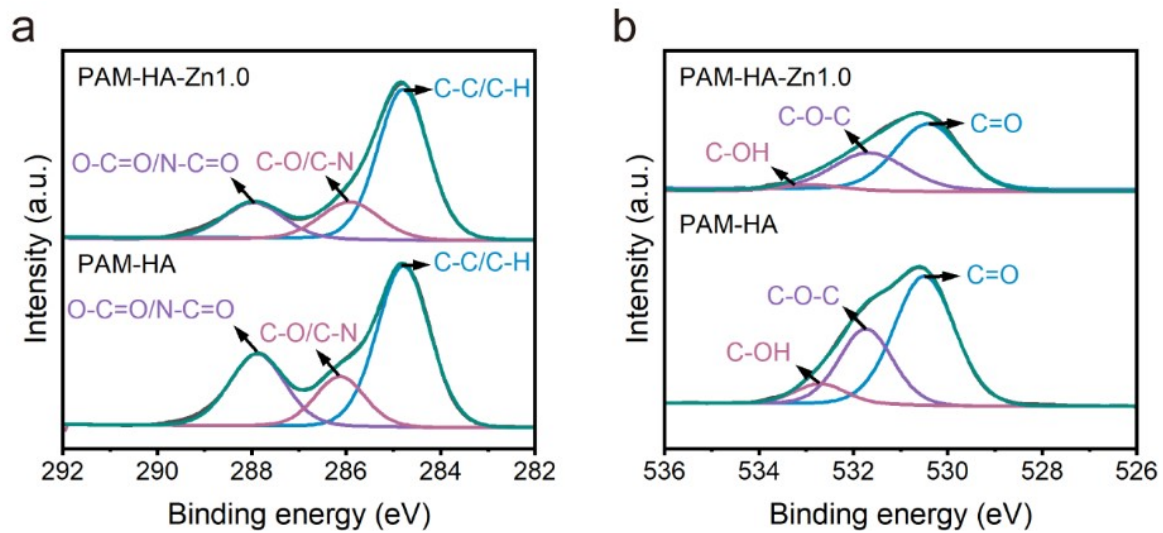

**Fig. S2.** XPS spectra of (a) C 1s and (b) O 1s for PAM-HA and PAM-HA-Zn1.0 hydrogels.

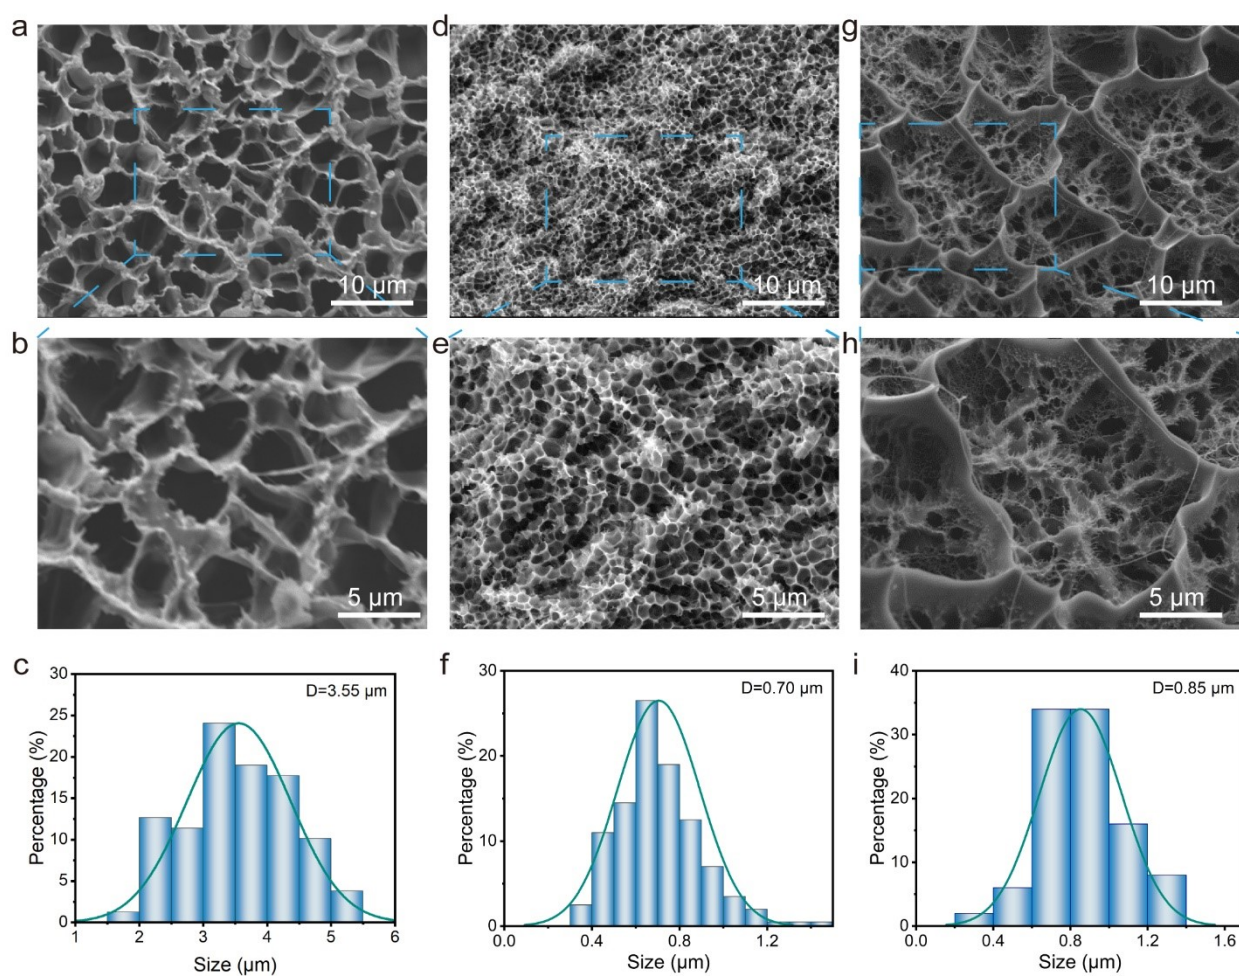

**Fig. S3.** SEM images and aperture distribution map of (a, b and c) PAM, (d, e and f) PAM-HA and (g, h and i) PAM-HA-Zn1.0 hydrogels.

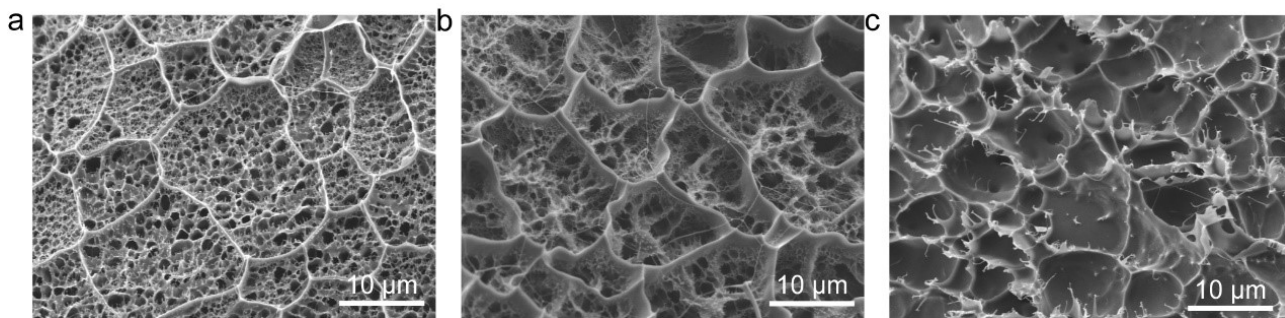

**Fig. S4.** SEM images of PAM-HA-Zn hydrogel with different  $\text{ZnCl}_2$  content. (a) PAM-HA-Zn0.5. (b) PAM-HA-Zn1.0. (c) PAM-HA-Zn2.0.

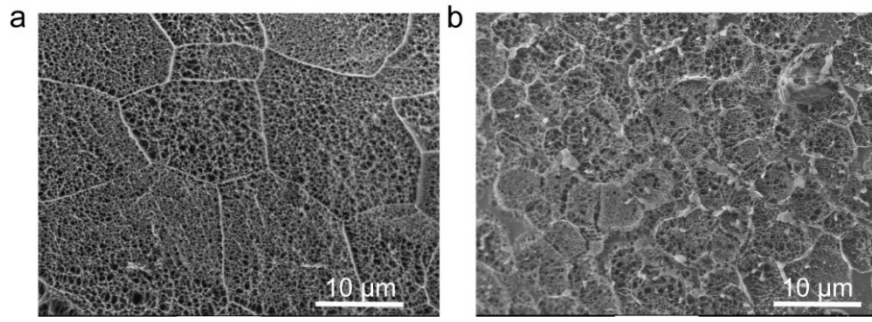

**Fig. S5.** The SEM images of PAM-HA-Zn1.0 hydrogels after 100 loading-unloading cycles at strain of (a) 100% and (b) 1000%.

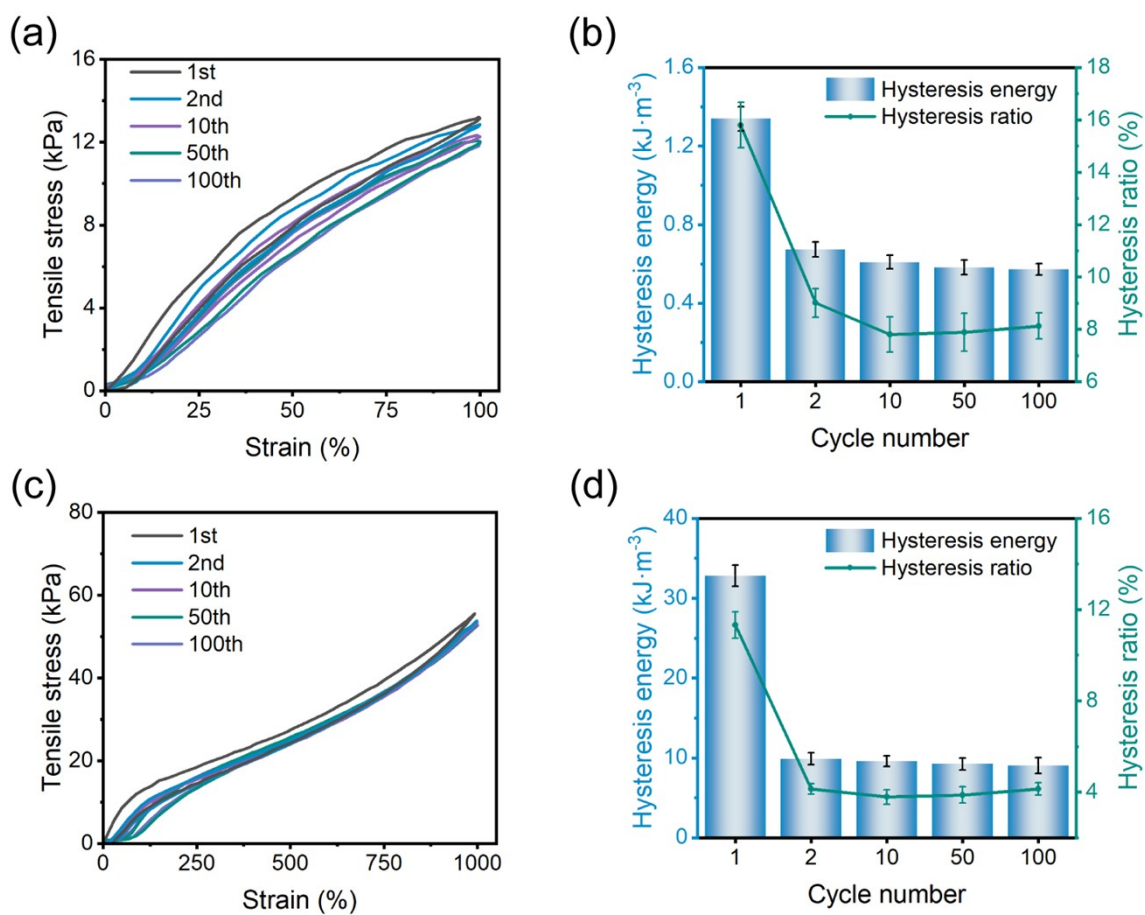

**Fig. S6.** (a) One hundred successive loading-unloading curves and (b) the corresponding hysteresis energy and hysteresis ratio of the PAM-HA-Zn1.0 hydrogel at strains of 100%. (c) One hundred successive loading-unloading curves and (d) the corresponding hysteresis energy and hysteresis ratio of the PAM-HA-Zn1.0 hydrogel at strains of 1000%.

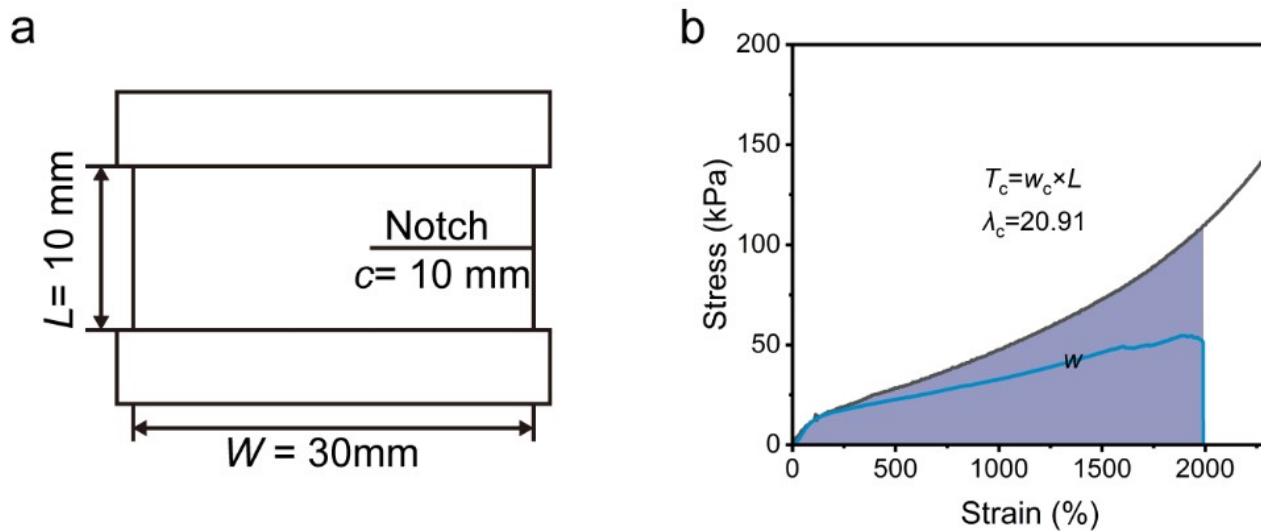

**Fig. S7.** (a) Measurement of fracture energy with the pure shear experiment and (b) tensile stress-strain curves of the notched sample and unnotched sample of PAM-HA-Zn1.0 hydrogel.



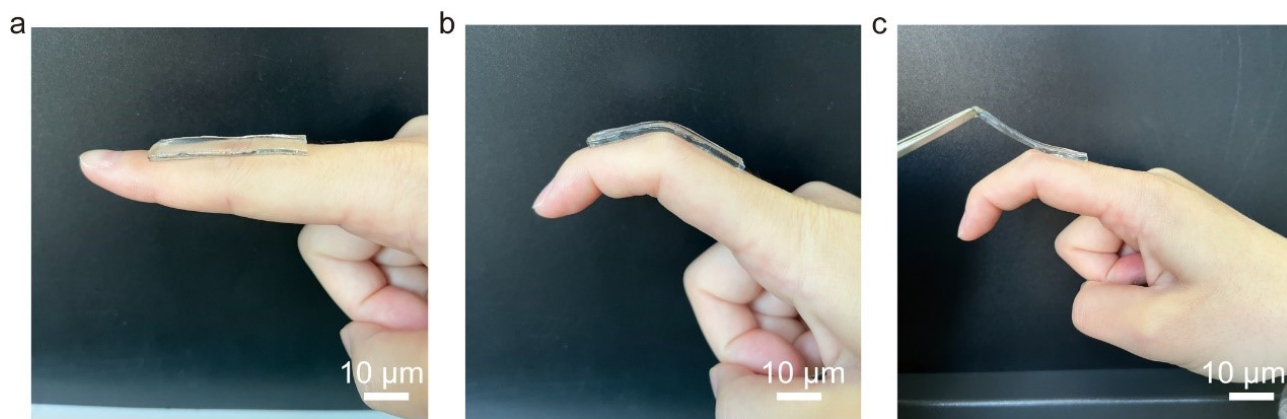

**Fig. S8.** Diagram of the PAM-HA-Zn1.0 hydrogel adhering to the human hand and the absence of any residue after being removed.

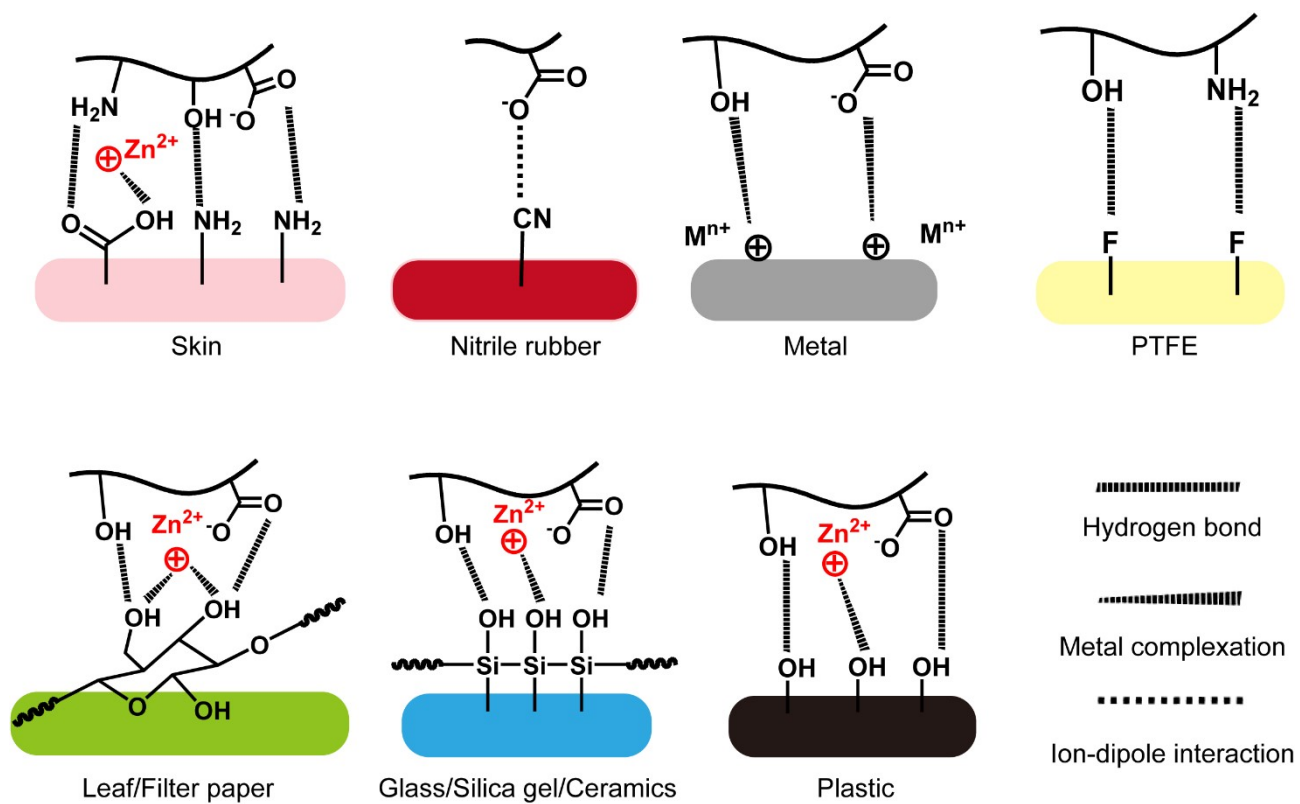

**Fig. S9.** Schematic diagram for the adhesion mechanism of PAM-HA-Zn1.0 hydrogel to various substrates.

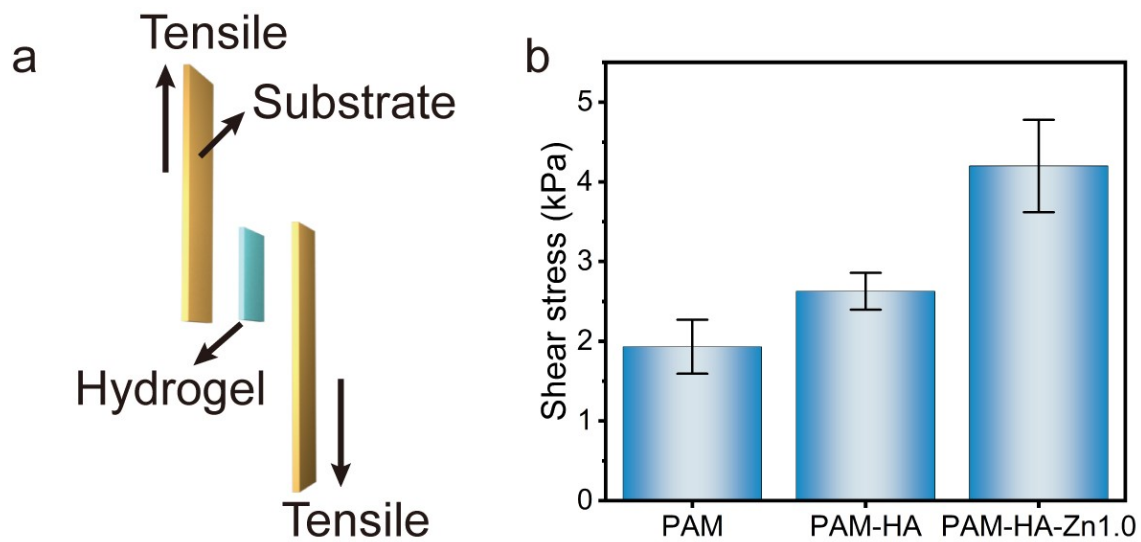

**Fig. S10.** (a) Schematic diagram for the adhesion measurements of hydrogels. (b) The adhesion strength of PAM, PAM-HA, PAM-HA-Zn1.0 hydrogel to porcine skin.

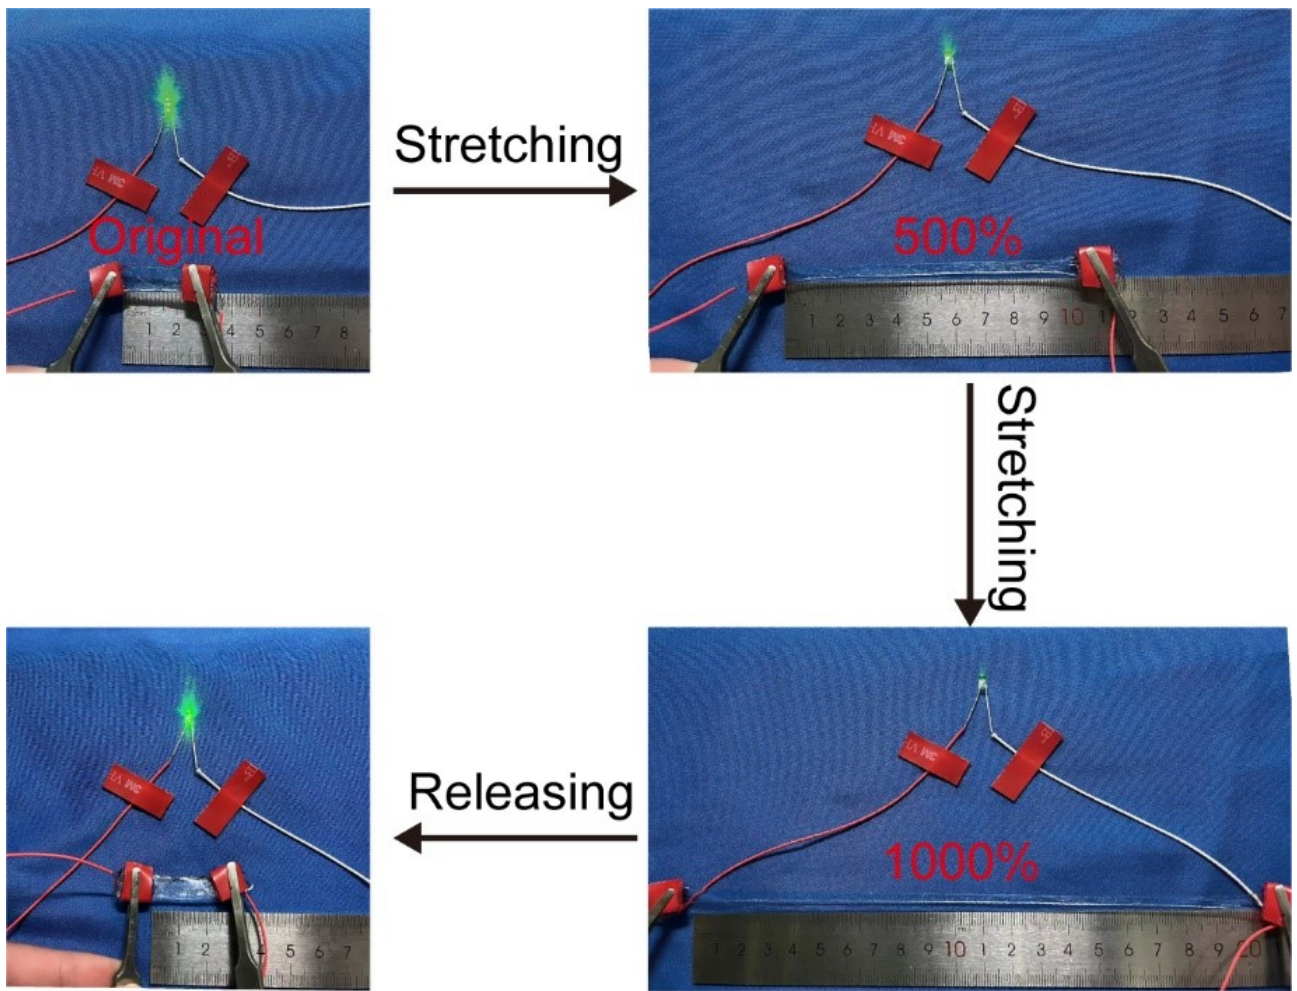

**Fig. S11.** Change in LED brightness with different strain of PAM-HA-Zn hydrogel connected in the electric circuit

**Composition of the hydrogels.** The composition of PAM hydrogel and PAM-HA hydrogel was shown in Table S1. The hydrogels with different contents of  $Zn^{2+}$  were named PAM-HA- $Zn_x$  in Table S1, where x represented the mass of  $ZnCl_2$  as a percentage of the total mass of HA and AM.

**Table S1.** Composition of the hydrogels.

| Name               | AAM(g) | HA(g) | APS(g) | MBA(g) | $ZnCl_2$ (g) | Water(g) |
|--------------------|--------|-------|--------|--------|--------------|----------|
| PAM                | 2.0    | 0     | 0.01   | 0.001  | 0            | 8.0      |
| PAM-HA             | 1.6    | 0.4   | 0.008  | 0.0008 | 0            | 8.0      |
| PAM-HA- $Zn_{0.5}$ | 1.6    | 0.4   | 0.008  | 0.0008 | 0.01         | 8.0      |
| PAM-HA- $Zn_{1.0}$ | 1.6    | 0.4   | 0.008  | 0.0008 | 0.02         | 8.0      |
| PAM-HA- $Zn_{2.0}$ | 1.6    | 0.4   | 0.008  | 0.0008 | 0.04         | 8.0      |

**Table S2.** Comparison of our work and recently reported gels.

| Name                        | Elongation at break (%) | Toughness (MJ m <sup>-3</sup> ) | Reference        |
|-----------------------------|-------------------------|---------------------------------|------------------|
| <b>PAM-HA-Zn1.0</b>         | <b>3040</b>             | <b>3.07</b>                     | <b>This work</b> |
| PAM/PBA-IL3/CNF2            | 1810                    | 2.65                            | [S1]             |
| MCP hydrogel                | 1100                    | 0.21                            | [S2]             |
| PAM-oxCNTs hydrogel         | 1074                    | 2.29                            | [S3]             |
| PAAm-Ferritin hydrogel      | 1400                    | 0.62                            | [S4]             |
| P(AA-MEA)-Graphene hydrogel | 1300                    | 1.95                            | [S5]             |
| Mxene-PVA hydrogel          | 1200                    | 0.04                            | [S6]             |
| Fe-SL-g-PAA hydrogel        | 1680                    | 0.59                            | [S7]             |
| PACG-M                      | 918                     | 0.59                            | [S8]             |
| AVN hydrogel                | 2333                    | ~ 1.5                           | [S9]             |

## Notes and references

- S1. X. Yao, S. Zhang, L. Qian, N. Wei, V. Nica, S. Coseri and F. Han, *Adv. Funct. Mater.*, 2022, **32**, 2204565.
- S2. X. Wang, N. Li, J. Yin, X. Wang, L. Xu, T. Jiao and Z. Qin, *Sci. China Mater.*, 2022, **66**, 272-283.
- S3. X. Sun, Z. Qin, L. Ye, H. Zhang, Q. Yu, X. Wu, J. Li and F. Yao, *Chem. Eng. J.*, 2020, **382**, 122832.
- S4. R. Wang, W. Chi, F. Wan, J. Wei, H. Ping, Z. Zou, J. Xie, W. Wang and Z. Fu, *ACS Appl. Mater. Interfaces*, 2022, **14**, 21278-21286.
- S5. X. Liu, Q. Zhang and G. Gao, *ACS Nano*, 2020, **14**, 13709-13717.
- S6. J. Zhang, L. Wan, Y. Gao, X. Fang, T. Lu, L. Pan and F. Xuan, *Adv. Electron. Mater.*, 2019, **5**, 1900285.
- S7. Q. Wang, X. Pan, C. Lin, X. Ma, S. Cao and Y. Ni, *Chem. Eng. J.*, 2020, **396**, 125341.
- S8. S. N. Li, Z. R. Yu, B. F. Guo, K. Y. Guo, Y. Li, L. X. Gong, L. Zhao, J. Bae and L. C. Tang, *Nano Energy*, 2021, **90**, 106502.
- S9. B. Wang, D. Liu, Y. Liao, Y. Huang, M. Ni, M. Wang, Z. Ma, Z. Wu and Y. Lu, *ACS Nano*, 2022, **16**, 20985-21001.
